# Supplementary material for: Daratumumab for autoimmune diseases: a systematic review
Source: PubMed Central journal article supplement — RMD Open. 2023 Dec 14;9(4):e003604. doi: 10.1136/rmdopen-2023-003604 (PMC10729190; doi:10.1136/rmdopen-2023-003604), 2023-12-14
Supplement: rmdopen-2023-003604supp001.pdf [file rmdopen-2023-003604supp001.pdf]

Supplementary table 1: Details of described cases of the included literature

| Authors                          | Patient | Disease | Sex    | Age (years) | Previous treatment                                             | Daratumumab application                                 | Daratumumab cumulative dosage | Concomitant treatment | Adverse events                                                                       | Outcome                            | Autoantibody titer       |
|----------------------------------|---------|---------|--------|-------------|----------------------------------------------------------------|---------------------------------------------------------|-------------------------------|-----------------------|--------------------------------------------------------------------------------------|------------------------------------|--------------------------|
| Aggarwal et al. 2023[1]          | 1       | aiTTP   | female | 64          | Gc, PLEX, RTX, Capla, MMF, Borte                               | 2x 1800mg/week sc                                       | 3600mg                        | Gc, Capla             | NA                                                                                   | improvement                        | depletion                |
|                                  | 2       | aiTTP   | female | 59          | Gc, PLEX, RTX, Capla, MMF, CsA                                 | 4x 16mg/kg/week iv                                      | NA                            | Gc                    | NA                                                                                   | failure                            | reduction                |
| Canales-Herrerias et al. 2022[2] | 3       | ITP     | male   | 34          | including Splenectomy, RTX, MMF, CsA, TPO-RA                   | 7x 16mg/kg/week iv                                      | NA                            | none                  | NA                                                                                   | remission                          | reduction                |
|                                  | 4       | ITP     | female | 35          | including RTX                                                  | 6x 16mg/kg/week iv                                      | NA                            | none                  | NA                                                                                   | transient remission before relapse | reduction                |
|                                  | 5       | ITP     | female | 20          | including RTX, Splenectomy                                     | 4x 16mg/kg/week iv                                      | NA                            | none                  | NA                                                                                   | relapse                            | reduction before relapse |
| Crickx et al. 2021[3]            | 6       | ITP     | male   | 70          | Gc, MMF, Sirol, CsA, Splenectomy                               | 4x 16mg/kg/week iv                                      | NA                            | Gc                    | mild reaction <sup>b,c</sup>                                                         | remission                          | not reported             |
|                                  | 7       | ITP     | female | 20          | Gc, IVIG, Romiplostim, Eltrombopag, MMF, Disulone, Splenectomy | 4x 16mg/kg/week iv                                      | NA                            | Gc, IVIG              | none <sup>c</sup>                                                                    | failure                            | not reported             |
| Dossier et al. 2021[4]           | 8       | INS     | male   | 6           | Gc, Cl, RTX, Obi                                               | 1x 1000mg/1,73m <sup>2</sup> iv (after 1 dosage of Obi) | 445mg                         | Tac                   | none <sup>a</sup>                                                                    | remission                          | not reported             |
|                                  | 9       | INS     | male   | 10.9        | Gc, Cyc, MMF, Cl, Lev, RTX, Obi                                | 1x 1000mg/1,73m <sup>2</sup> iv (after 1 dosage of Obi) | 770mg                         | Gc                    | broncho-spasm <sup>b</sup> , throat itching <sup>b</sup> , labial edema <sup>b</sup> | relapse                            | not reported             |

| Authors | Patient | Disease | Sex    | Age (years) | Previous treatment              | Daratumumab application                                 | Daratumumab cumulative dosage | Concomitant treatment | Adverse events                                                                       | Outcome   | Autoantibody titer |
|---------|---------|---------|--------|-------------|---------------------------------|---------------------------------------------------------|-------------------------------|-----------------------|--------------------------------------------------------------------------------------|-----------|--------------------|
|         | 10      | INS     | male   | 9.5         | Gc, MMF, CI, RTX, Obi           | 1x 1000mg/1,73m <sup>2</sup> iv (after 1 dosage of Obi) | 800mg                         | Gc, CsA               | urticaria <sup>b</sup> , neutropenia                                                 | remission | not reported       |
|         | 11      | INS     | male   | 13.7        | Gc, MMF, CI, Lev, RTX, Ofa, Obi | 1x 1000mg/1,73m <sup>2</sup> iv (after 1 dosage of Obi) | 820mg                         | Tac                   | vomiting <sup>b</sup> hypogammaglobulinemia                                          | remission | not reported       |
|         | 12      | INS     | male   | 10.9        | Gc, MMF, CI, RTX, Obi           | 1x 1000mg/1,73m <sup>2</sup> iv (after 1 dosage of Obi) | 750mg                         | Gc                    | none <sup>a</sup>                                                                    | remission | not reported       |
|         | 13      | INS     | female | 14.7        | Gc, Cyc, MMF, CI, Lev, RTX, Obi | 1x 1000mg/1,73m <sup>2</sup> iv (after 1 dosage of Obi) | 870mg                         | Gc                    | none <sup>a</sup>                                                                    | remission | not reported       |
|         | 14      | INS     | male   | 18.8        | Gc, Cyc, MMF, CI, Lev, RTX, Obi | 1x 1000mg/1,73m <sup>2</sup> iv (after 1 dosage of Obi) | 1000mg                        | Gc                    | hypogammaglobulinemia                                                                | remission | not reported       |
|         | 15      | INS     | male   | 10.3        | Gc, MMF, CI, Lev, RTX, Obi      | 1x 1000mg/1,73m <sup>2</sup> iv (after 1 dosage of Obi) | 700mg                         | Tac                   | hypogammaglobulinemia                                                                | relapse   | not reported       |
|         | 16      | INS     | male   | 14.7        | Gc, MMF, CI, Lev, RTX, Obi      | 1x 1000mg/1,73m <sup>2</sup> iv (after 1 dosage of Obi) | 900mg                         | Tac                   | neutropenia, hypogammaglobulinemia                                                   | remission | not reported       |
|         | 17      | INS     | male   | 10.5        | Gc, MMF, CI, RTX; Ofa, Obi      | 1x 1000mg/1,73m <sup>2</sup> iv (after 1 dosage of Obi) | 680mg                         | Gc, Tac               | vomiting <sup>b</sup> , hypogammaglobulinemia                                        | relapse   | not reported       |
|         | 18      | INS     | male   | 11.2        | Gc, MMF, Lev, RTX, Obi          | 1x 1000mg/1,73m <sup>2</sup> iv (after 1 dosage of Obi) | 600mg                         | Gc, Tac               | none <sup>a</sup>                                                                    | relapse   | not reported       |
|         | 19      | INS     | male   | 11          | Gc, MMF, CI, Lev, RTX; Ofa, Obi | 1x 1000mg/1,73m <sup>2</sup> iv (after 1 dosage of Obi) | 770mg                         | Gc, Tac               | broncho-spasm <sup>b</sup> , throat itching <sup>b</sup> , labial edema <sup>b</sup> | remission | not reported       |

| Authors                                | Patient | Disease                  | Sex                | Age (years) | Previous treatment                                               | Daratumumab application                                           | Daratumumab cumulative dosage | Concomitant treatment | Adverse events                                                                       | Outcome                            | Autoantibody titer |
|----------------------------------------|---------|--------------------------|--------------------|-------------|------------------------------------------------------------------|-------------------------------------------------------------------|-------------------------------|-----------------------|--------------------------------------------------------------------------------------|------------------------------------|--------------------|
|                                        | 20      | INS                      | male               | 15.7        | Gc, MMF, CI, RTX, Obi                                            | 1x 1000mg/1,73m <sup>2</sup> iv (after 1 dosage of Obi)           | 750mg                         | Gc                    | broncho-spasm <sup>b</sup> , throat itching <sup>b</sup> , labial edema <sup>b</sup> | remission                          | not reported       |
|                                        | 21      | INS                      | male               | 9.7         | Gc, CI, RTX, Obi                                                 | 1x 1000mg/1,73m <sup>2</sup> iv (after 1 dosage of Obi)           | 580mg                         | Gc, Tac               | broncho-spasm <sup>b</sup> , throat itching <sup>b</sup> , labial edema <sup>b</sup> | relapse                            | not reported       |
| <b>Dossier et al. 2022[5]</b>          | 22-27   | 3 FSGS<br>3 MCD          | 4 male<br>2 female | 6.1         | CsA or Tac, MMF in 4 patients, RTX or Obi, IA                    | 4x 1000mg/1,73m <sup>2</sup> iv                                   | NA                            | Obi                   | NA                                                                                   | remission                          | not reported       |
| <b>Gangat et al. 2022[6]</b>           | 28      | acquired idiopathic PRCA | female             | 74          | Gc, CsA, RTX, ATG, Alemtuzumab, Cyc, Borte, Eltrombopag, Danazol | XYx 16mg/kg/week for 8 weeks, then every 2 weeks, then monthly iv | NA                            | none                  | upper respiratory tract infection                                                    | remission                          | not reported       |
| <b>Holzer et al. 2023[7]</b>           | 29      | MDA5+ DM                 | male               | 19          | Gc, IVIG, Cyc, Tofa, MMF, RTX, CsA, Anakinra                     | 4x 1800mg/week sc                                                 | 7200mg                        | Gc                    | none                                                                                 | remission                          | depletion          |
| <b>Jain et al. 2020[8]</b>             | 30      | AIHA                     | female             | 60          | Gc, Aza, RTX                                                     | 4x 16mg/kg/week iv                                                | NA                            | Gc, RTX, Splenectomy  | none                                                                                 | transient remission before relapse | not reported       |
| <b>Krusche et al. 2023[9]</b>          | 31      | PR3+ GPA                 | female             | 29          | Gc, Cyc, RTX, PLEX                                               | 4x1800mg/week sc                                                  | 7200mg                        | Gc, ECMO              | none                                                                                 | remission                          | reduction          |
| <b>Landon-Cardinal et al. 2023[10]</b> | 32      | SRP+ IMNM                | male               | 27          | Gc, MTX, IVIG, RTX, PLEX, Tac                                    | XYx 16mg/kg/week for 8 weeks, then every 2 weeks, then monthly iv | NA                            | Gc, IVIG, MTX, Tac    | hypogammaglobulinemia<br>mild infection                                              | remission                          | reduction          |
| <b>Liu et al. 2023[11]</b>             | 33      | acquired hemophilia A    | female             | 37          | Gc, CsA, HCO, Cyc, MMF                                           | 12x 4mg/kg/week, then 8x 8mg/kg/week iv                           | NA                            | Gc                    | none                                                                                 | remission                          | depletion          |

| Authors                                               | Patient | Disease               | Sex    | Age (years) | Previous treatment           | Daratumumab application                                       | Daratumumab cumulative dosage | Concomitant treatment | Adverse events                             | Outcome     | Autoantibody titer |
|-------------------------------------------------------|---------|-----------------------|--------|-------------|------------------------------|---------------------------------------------------------------|-------------------------------|-----------------------|--------------------------------------------|-------------|--------------------|
|                                                       | 34      | acquired hemophilia A | male   | 32          | Gc, Cyc, RTX                 | 9x 8mg/kg/week iv                                             | NA                            | Gc                    | none                                       | remission   | depletion          |
|                                                       | 35      | acquired hemophilia A | male   | 73          | Gc, Cyc, Borte, Zanubrutinib | 1x 4mg/kg/week, then 12x 8mg/kg/week, then 5x 16mg/kg/week iv | NA                            | Gc                    | none                                       | remission   | reduction          |
|                                                       | 36      | acquired hemophilia A | male   | 70          | Gc, Cyc                      | 14x 8mg/kg/week iv                                            | NA                            | Gc                    | none                                       | remission   | reduction          |
| <b>McGothlin et al. 2023[12]</b>                      | 37      | AIHA                  | female | 64          | Gc, RTX, Splenectomy         | Xx iv                                                         | NA                            | NA                    | none                                       | remission   | not reported       |
| <b>Mohamed et al. 2023[13]</b>                        | 38      | CAD                   | female | 69          | RTX                          | 18x 16mg/kg/week iv                                           | NA                            | EPO                   | fatigue <sup>b</sup>                       | remission   | not reported       |
| <b>Moonla et al. 2021[14], Moonla et al. 2019[15]</b> | 39      | acquired hemophilia A | male   | 21          | RTX, PLEX, HD-ITI            | 8x 16mg/kg/week iv                                            | NA                            | RTX, PLEX, ITI        | hypogammaglobulinemia                      | improvement | depletion          |
| <b>Moonla et al. 2021[14]</b>                         | 40      | acquired hemophilia A | NA     | 18          | HD-ITI                       | 5x 16mg/kg/week iv                                            | NA                            | HD-ITI, LD-ITI        | NA                                         | improvement | depletion          |
|                                                       | 41      | acquired hemophilia A | NA     | 16          | HD-ITI                       | 6x 16mg/kg/week iv                                            | NA                            | RTX, PLEX, HD-ITI, Gc | Sepsis, pneumonia, RTX-induced pneumonitis | death       | no effect          |
| <b>Moonla et al. 2022[16]</b>                         | 42      | acquired hemophilia A | male   | 33          | Gc, Cyc                      | 4x 16mg/kg/week iv                                            | NA                            | Gc                    | transient hypogammaglobulinemia            | remission   | depletion          |

| Authors                                                     | Patient | Disease                                        | Sex    | Age (years) | Previous treatment                             | Daratumumab application                                         | Daratumumab cumulative dosage | Concomitant treatment               | Adverse events                                                                                                              | Outcome     | Autoantibody titer |
|-------------------------------------------------------------|---------|------------------------------------------------|--------|-------------|------------------------------------------------|-----------------------------------------------------------------|-------------------------------|-------------------------------------|-----------------------------------------------------------------------------------------------------------------------------|-------------|--------------------|
| <b>Moonla et al. 2023[17]</b>                               | 43      | acquired hemophilia A                          | male   | 35          | Gc, Factor VII, Prothrombin, Cyc               | 4x 16mg/kg/week iv                                              | NA                            | Gc, Cyc po, Factor VII, Prothrombin | transient hypogammaglobulinemia                                                                                             | remission   | depletion          |
| <b>Mutlu et al. 2023[18]</b>                                | 44      | SLE with cerebral vasculitis                   | female | 39          | Gc, HCQ, RTX, Bel, Upa, Cyc, MMF               | 4x 1800mg/week sc                                               | 7200mg                        | Gc, Bel                             | none                                                                                                                        | improvement | depletion          |
| <b>Nocturne et al. 2023[19]</b>                             | 45      | Primary SjD with hyperchylomicronemia          | female | 18          | RTX                                            | 4x 1800mg/week sc                                               | 7200mg                        | none                                | none                                                                                                                        | remission   | reduction          |
|                                                             | 46      | Primary SjD with cryoglobulinemia              | female | 68          | RTX, Cyc, Bel                                  | 4x 1800mg/week sc                                               | 7200mg                        | none                                | none                                                                                                                        | remission   | reduction          |
| <b>Ochoa et al. 2021[20]</b>                                | 47      | anti-IFN $\gamma$ antibodies in MOTT infection | female | 31          | RTX, anti-MOTT therapy, Borte                  | 5x 16mg/kg/week iv                                              | NA                            | IVIg                                | dyspnea <sup>b</sup> , urticaria <sup>b</sup> , hypogammaglobulinemia lymphocytic meningitis without detection of pathogens | improvement | reduction          |
| <b>Ostendorf et al. 2020[21], Alexander et al. 2023[22]</b> | 48      | SLE with LN                                    | female | 50          | Gc, Aza, MMF, CsA, Borte, Cyc                  | 4x 16mg/kg/week iv                                              | NA                            | Gc, MMF, Bel, IVIg                  | hypogammaglobulinemia                                                                                                       | improvement | reduction          |
|                                                             | 49      | SLE                                            | female | 32          | Gc, IVIg, MMF, Cyc, HCQ, Bel, RTX, PLEX, Borte | 4x 16mg/kg/week iv                                              | NA                            | Gc, Bel                             | upper respiratory tract infection                                                                                           | improvement | reduction          |
| <b>Ostendorf et al. 2023[23]</b>                            | 50      | MPO+ MPA                                       | male   | 57          | Gc, Cyc, RTX                                   | 4x 1800mg/week sc, 2 <sup>nd</sup> cycle with 4x after 4 months | 14400mg                       | NA                                  | upper respiratory tract infection                                                                                           | remission   | reduction          |

| Authors                            | Patient | Disease                                                                            | Sex    | Age (years) | Previous treatment                                                     | Daratumumab application                               | Daratumumab cumulative dosage | Concomitant treatment      | Adverse events                                                                                      | Outcome                            | Autoantibody titer |
|------------------------------------|---------|------------------------------------------------------------------------------------|--------|-------------|------------------------------------------------------------------------|-------------------------------------------------------|-------------------------------|----------------------------|-----------------------------------------------------------------------------------------------------|------------------------------------|--------------------|
|                                    | 51      | PR3+ GPA                                                                           | male   | 41          | Gc, Cyc, RTX, PLEX, ECMO                                               | 4x 1800mg/week sc                                     | 7200mg                        | IVIG                       | hypogammaglobulinemia                                                                               | remission                          | reduction          |
| <b>Ostendorf et al. 2023[24]</b>   | 52      | MDA5+ DM                                                                           | female | 55          | Gc, Tofa, CsA, IVIG, Cyc, ECMO                                         | 4x 1800mg/week sc                                     | 7200mg                        | Gc, Tofa, CsA, IVIG, ECMO  | blood stream infection                                                                              | improvement                        | depletion          |
| <b>Pereda et al. 2022[25]</b>      | 53      | red cell antibodies inducing hemolytic transfusion reaction in sickle cell disease | female | 17          | Gc, RTX                                                                | 6x 16mg/kg/week iv                                    | NA                            | none                       | none                                                                                                | remission                          | depletion          |
| <b>Plequezuelo et al. 2021[26]</b> | 54      | primary APS                                                                        | female | 21          | Anticoagulation, HCQ, PLEX, IVIG                                       | 4x 8mg/kg/week, then 16mg/kg/week iv                  | NA                            | Anticoagulation, IVIG      | mild diarrhea <sup>b</sup> , one upper respiratory tract infection, transient hypogammaglobulinemia | improvement                        | reduction          |
| <b>Ratuszny et al. 2020[27]</b>    | 55      | NMDA-R+ encephalitis                                                               | female | 20          | Gc, RTX, PLEX, IVIG, Cyc, Borte                                        | 8x 16mg/kg/week for 8 weeks, then 2x every 2 weeks iv | 8000mg                        | Gc, IVIG, later Borte, RTX | NA                                                                                                  | improvement                        | no effect          |
| <b>Rieger et al. 2021[28]</b>      | 56      | AIHA                                                                               | female | 44          | Gc, IVIG, RTX, Hematopoiesis stimulating agents, Splenectomy, Cyc, MMF | 6x 16mg/kg/week iv, 2nd cycle after some months       | NA                            | Eltrombopag                | NA                                                                                                  | remission                          | not reported       |
|                                    | 57      | AIHA                                                                               | female | 55          | Gc, RTX                                                                | 6x 16mg/kg/week iv                                    | NA                            | Gc                         | NA                                                                                                  | transient remission before relapse | not reported       |

| Authors                           | Patient | Disease  | Sex    | Age (years) | Previous treatment                 | Daratumumab application                                                     | Daratumumab cumulative dosage | Concomitant treatment   | Adverse events                                     | Outcome                        | Autoantibody titer |
|-----------------------------------|---------|----------|--------|-------------|------------------------------------|-----------------------------------------------------------------------------|-------------------------------|-------------------------|----------------------------------------------------|--------------------------------|--------------------|
| <b>Rixecker et al. 2023[29]</b>   | 58      | PR3+ GPA | male   | NA          | Gc, RTX, Cyc, PLEX, ECMO, Avacopan | 6x 16mg/kg/week iv                                                          | NA                            | Gc, Cyc, ECMO, Avacopan | NA                                                 | remission                      | depletion          |
| <b>Roccatello et al. 2023[30]</b> | 59      | LN       | male   | 41          | Gc, RTX, Cyc, Bel, Aza             | 8x 16mg/kg/week for 8 weeks, then 4x every 2 weeks, then 10x every month iv | NA                            | Gc                      | asymptomatic SARS-CoV2-infection                   | 3x remission<br>2x improvement | reduction          |
|                                   | 60      | LN       | female | 24          | Gc, MMF, RTX, Cyc                  | 8x 16mg/kg/week for 8 weeks, then 4x every 2 weeks, then 10x every month iv | NA                            | Gc                      | none                                               |                                | reduction          |
|                                   | 61      | LN       | female | 61          | Gc, RTX, Cyc                       | 8x 16mg/kg/week for 8 weeks, then 4x every 2 weeks, then 10x every month iv | NA                            | Gc                      | none                                               |                                | reduction          |
|                                   | 62      | LN       | female | 20          | Gc, MMF, RTX, CsA, Bel             | 8x 16mg/kg/week for 8 weeks, then 4x every 2 weeks, then 10x every month iv | NA                            | Gc                      | mild redness <sup>b</sup> , asymptomatic SARS-Cov2 |                                | reduction          |
|                                   | 63      | LN       | female | 54          | Gc, MMF, IVIG, Bel                 | 8x 16mg/kg/week for 8 weeks, then 4x every 2 weeks, then 10x every month iv | NA                            | Gc                      | none                                               |                                | reduction          |
|                                   | 64      | LN       | female | 28          | Gc, RTX, Cyc, Ocrelizumab          | Xx 16mg/kg/week for 8 weeks, then every 2 weeks, then every month iv        | NA                            | Gc                      | none                                               | failure                        | not reported       |

| Authors                                                 | Patient | Disease              | Sex    | Age (years) | Previous treatment                | Daratumumab application                                                      | Daratumumab cumulative dosage | Concomitant treatment | Adverse events                                                                                                             | Outcome     | Autoantibody titer |
|---------------------------------------------------------|---------|----------------------|--------|-------------|-----------------------------------|------------------------------------------------------------------------------|-------------------------------|-----------------------|----------------------------------------------------------------------------------------------------------------------------|-------------|--------------------|
| <b>Rottländer et al. 2022[31]</b>                       | 65      | SLE                  | female | 74          | Gc, HCQ, Aza, Cyc, MMF, RTX, IVIG | 4x 8mg/kg/week iv                                                            | NA                            | none                  | NA                                                                                                                         | remission   | not reported       |
| <b>Scheibe et al. 2022[32], Scheibe et al. 2020[33]</b> | 66      | CASPR2-encephalitis  | male   | 57          | Gc, PLEX, IA, IVIG, RTX, Borte    | 8x 16mg/kg/week for 8 weeks, then 4x every 2 weeks, then 1x after 1 month iv | NA                            | Gc, PLEX, RTX, IVIG   | hypogammaglobulinemias epsis                                                                                               | death       | reduction          |
| <b>Scheibe et al. 2022[32]</b>                          | 67      | CASPR2-encephalitis  | male   | 66          | Gc, PLEX, RTX                     | 8x 16mg/kg/week iv                                                           | NA                            | Gc, RTX, PLEX, IVIG   | hypogammaglobulinemias infections including sepsis                                                                         | death       | reduction          |
|                                                         | 68      | NMDA-R+ encephalitis | male   | 16          | Gc, PLEX, IA, IVIG, RTX           | 6x 16mg/kg/week iv                                                           | NA                            | Gc, IVIG, Borte       | fever <sup>b</sup> , tracheobronchitis <sup>b</sup> , hypogammaglobulinemia                                                | improvement | depletion          |
|                                                         | 69      | AE                   | male   | 59          | Gc, PLEX, IVIG, RTX               | 8x 16mg/kg/week iv                                                           | NA                            | Gc, IVIG, RTX         | tracheobronchitis <sup>b</sup> , fever <sup>b</sup> , tachycardia and -pnea <sup>b</sup> , fungemia, hypogammaglobulinemia | improvement | not applicable     |
|                                                         | 70      | AE                   | female | 27          | Gc, PLEX, IVIG, RTX               | 4x 16mg/kg/week iv                                                           | NA                            | Gc, RTX, Aza          | inflammatory serology without                                                                                              | improvement | depletion          |



| Authors                              | Patient | Disease                       | Sex    | Age (years) | Previous treatment                                                 | Daratumumab application                                                    | Daratumumab cumulative dosage | Concomitant treatment | Adverse events                                                                                                 | Outcome                           | Autoantibody titer |
|--------------------------------------|---------|-------------------------------|--------|-------------|--------------------------------------------------------------------|----------------------------------------------------------------------------|-------------------------------|-----------------------|----------------------------------------------------------------------------------------------------------------|-----------------------------------|--------------------|
|                                      | 71      | CIDP                          | male   | 52          | Gc, PLEX, IVIG, RTX                                                | 8x 16mg/kg/week for 8 weeks, then 12x 16mg/kg/month iv                     | NA                            | Gc, MTX, IVIG         | clinical infection<br>dyspnea, night sweat, fever <sup>b</sup> , blood stream infection, hypogammaglobulinemia | improvement                       | depletion          |
|                                      | 72      | seronegative MG               | male   | 54          | Gc, IVIG, PLEX, IA, Aza, MMF, MTX, RTX, Eculizumab                 | 8x 16mg/kg/week for 8 weeks, then 4x every 2 weeks, then 8x every month iv | NA                            | Gc, PLEX, IVIG        | dyspnea <sup>b</sup> , tachycardia <sup>b</sup> , fatigue, muscle pain, hypogammaglobulinemia                  | improvement                       | not applicable     |
| <b>Strüßmann et al. 2023[34]</b>     | 73      | ITP                           | male   | 39          | Gc, Splenectomy, Eltrombopag, Romiplostim, RTX, Fostamatinib, IVIG | 3x 1800mg/week sc                                                          | 5400mg                        | none                  | NA                                                                                                             | remission                         | not reported       |
| <b>van den Beerg et al. 2022[35]</b> | 74      | aiTTP                         | male   | 32          | Gc, PLEX, RTX, Capla                                               | 4x 16mg/kg/week iv                                                         | NA                            | Gc                    | none                                                                                                           | remission                         | depletion          |
|                                      | 75      | aiTTP                         | female | 31          | Gc, PLEX, RTX, Capla                                               | 6x 16mg/kg/week iv                                                         | NA                            | Capla                 | none                                                                                                           | remission                         | depletion          |
| <b>Vernava et al. 2023[36]</b>       | 76      | ITP                           | female | 82          | Gc, IVIG, Eltrombopag, RTX                                         | 8x 16mg/kg/week for 16 weeks, then 4x every 2 weeks iv                     | NA                            | Gc, IVIG              | hypogammaglobulinemia                                                                                          | remission                         | not reported       |
|                                      | 77      | ITP                           | male   | 54          | Gc, Romiplostim sc, Eltrombopag, RTX, IVIG                         | 8x 16mg/kg/week iv                                                         | NA                            | Gc, Fostamatinib      | dyspnea <sup>b</sup> , flush <sup>b</sup>                                                                      | stabilization without improvement | not reported       |
| <b>Vink et al. 2022[37]</b>          | 78      | PLAR2+ membranous nephropathy | female | 38          | Gc, MMF, RTX, Cyc, Bort                                            | 8x 16mg/kg/week for 8 weeks, then 6x every 2 weeks iv                      | NA                            | RTX, Borte            | NA                                                                                                             | improvement                       | reduction          |

| Authors             | Patient | Disease | Sex    | Age (years) | Previous treatment | Daratumumab application | Daratumumab cumulative dosage | Concomitant treatment | Adverse events | Outcome                                      | Autoantibody titer        |
|---------------------|---------|---------|--------|-------------|--------------------|-------------------------|-------------------------------|-----------------------|----------------|----------------------------------------------|---------------------------|
| Xie et al. 2023[38] | 79      | aiTTP   | female | 35          | Gc, PLEX, RTX      | 1x 100mg iv             | 100mg                         | Gc, PLEX, RTX         | none           | remission                                    | depletion                 |
|                     | 80      | aiTTP   | female | 53          | Gc, PLEX, RTX      | 1x 100mg iv             | 100mg                         | Gc, PLEX, RTX         | none           | relapse, after 5 more treatment rounds       | remission<br>not measured |
|                     | 81      | aiTTP   | female | 48          | Gc, PLEX, RTX      | 1x 100mg iv             | 100mg                         | Gc, PLEX, RTX         | none           | remission                                    | no effect                 |
|                     | 82      | aiTTP   | female | 52          | Gc, PLEX, RTX      | 1x 100mg iv             | 100mg                         | Gc, PLEX, RTX         | oral soor      | remission                                    | depletion                 |
|                     | 83      | aiTTP   | male   | 71          | Gc, PLEX           | 1x 100mg iv             | 100mg                         | Gc, PLEX, RTX         | none           | exacerbation, after 11 more treatment rounds | remission<br>depletion    |

Abbreviations (alphabetically sorted): AE = autoimmune encephalitis, AIHA = autoimmune hemolytic anemia, APS = anti-phospholipid-syndrome, aiTTP = acquired immune mediated thrombotic thrombocytopenic purpura, ATG = anti-thymocyte globulin, Aza = azathioprine, Bel = belimumab, Borte = bortezomib, CAD = Cold agglutinin disease, Capla = caplacizumab, CI = calcineurin inhibitor, CIDP = chronic inflammatory demyelinating disease, CsA = ciclosporin A, Cyc = cyclophosphamide, DM = dermatomyositis, ECMO = extracorporeal membrane oxygenation, EPO = erythropoietin, Gc = glucocorticoids, GPA = granulomatosis with polyangiitis, HD/LD-ITI = high dose/low dose immune tolerance induction (=Factor VIII), HCQ = hydroxychloroquine, IA = immunoadsorption, IFN $\gamma$  = interferon  $\gamma$ , IMNM = immune mediated necrotizing myopathy, INS = idiopathic nephrotic syndrome, ITP = immune thrombocytopenic purpura, iv = intravenous, IVIG = intravenous immunoglobulin, Lev = levamisole, LN = lupus nephritis, MG = myasthenia gravis, MMF = mycophenolate mofetil, MOTT = mycobacteria other than tuberculosis, MPA = microscopic polyangiitis, MTX = methotrexate, NA = not reported, Obi = Obinutuzumab, Ofa = ofatumumab, PLEX = plasmapheresis, PRCA = pure red cell aplasia, RTX = rituximab, sc = subcutaneous, Sirol = sirolimus, SjD = Sjögren's disease, SLE = systemic lupus erythematosus, Tac = tacrolimus, Tofa = tofacitinib, TPO-RA = thrombopoietin receptor agonists, Upa = upadacitinib

<sup>a</sup>: 2 of 4 patients with no adverse events had hypogammaglobulinemia

<sup>b</sup>: infusion reaction

<sup>c</sup>: hypogammaglobulinemia in most patients, not stated which

Supplementary table 2: Active, recruiting or planned clinical trials for daratumumab in autoimmune diseases (clinicaltrials.gov on 25<sup>th</sup> of June 2023)

| NCT Number         | Study Title                                                                                                                                  | Study Status           | Conditions                   | Interventions                                                | Study Type     |
|--------------------|----------------------------------------------------------------------------------------------------------------------------------------------|------------------------|------------------------------|--------------------------------------------------------------|----------------|
| <b>NCT05671757</b> | Daratumumab in Primary Antiphospholipid Syndrome                                                                                             | recruiting             | Autoimmune Disorders         | BIOLOGICAL: Daratumumab                                      | interventional |
| <b>NCT04868838</b> | Daratumumab to Treat Active Lupus Nephritis                                                                                                  | recruiting             | Lupus Nephritis              | DRUG: Daratumumab                                            | interventional |
| <b>NCT04810754</b> | An Open Label Study to Evaluate Daratumumab in Participants With Moderate to Severe Systemic Lupus Erythematosus                             | not yet recruiting     | Systemic Lupus Erythematosus | DRUG: Daratumumab Injection                                  | interventional |
| <b>NCT04703621</b> | The DART Study- Daratumumab Treatment in ITP                                                                                                 | recruiting             | ITP                          | DRUG: Daratumumab Injection                                  | interventional |
| <b>NCT05562882</b> | A Clinical Trial to Assess Safety and Efficacy of Daratumumab in the Treatment of Primary Immune Thrombocytopenia                            | not yet recruiting     | Immune Thrombocytopenia      | DRUG: Daratumumab Injection                                  | interventional |
| <b>NCT05403138</b> | Safety and Efficacy of Daratumumab in Patients With Anti-Aquaporin 4 Antibody Positive Neuromyelitis Optica Spectrum Disorders               | recruiting             | Neuromyelitis Optica         | DRUG: Daratumumab   DRUG: Placebo                            | interventional |
| <b>NCT04070378</b> | Study of Daratumumab in Patients With Mild to Moderate Alzheimer's Disease                                                                   | active, not recruiting | Alzheimer Disease            | DRUG: Daratumumab Injection                                  | interventional |
| <b>NCT05486481</b> | Venetoclax, Daratumumab, and Dexamethasone for Systemic Light-Chain Amyloidosis With Translocation (11)                                      | not yet recruiting     | AL Amyloidosis               | DRUG: Venetoclax   DRUG: Dexamethasone   DRUG: Daratumumab,  | interventional |
| <b>NCT04895917</b> | Daratumumab and Pomalidomide in Previously Treated Patients With AL Amyloidosis                                                              | recruiting             | AL Amyloidosis               | DRUG: daratumumab and pomalidomide                           | interventional |
| <b>NCT04270175</b> | Daratumumab, Pomalidomide, and Dexamethasone (DPd) in Relapsed/Refractory Light Chain Amyloidosis Patients Previously Exposed to Daratumumab | recruiting             | AL Amyloidosis               | DRUG: Daratumumab   DRUG: Pomalidomide   DRUG: Dexamethasone | interventional |

| NCT Number         | Study Title                                                                                                                       | Study Status           | Conditions                                                  | Interventions                                                                 | Study Type     |
|--------------------|-----------------------------------------------------------------------------------------------------------------------------------|------------------------|-------------------------------------------------------------|-------------------------------------------------------------------------------|----------------|
| <b>NCT05004259</b> | The Safety of Repurposing Daratumumab for Relapsed or Refractory Autoimmune Antibody Mediated Hemolytic Anemia                    | recruiting             | Hemolytic Anemia                                            | DRUG: Daratumumab / Hyaluronidase Injection                                   | interventional |
| <b>NCT03283917</b> | Daratumumab, Ixazomib, and Dexamethasone in AL Amyloidosis                                                                        | active, not recruiting | Newly Diagnosed/Recurrent or refractory Primary Amyloidosis | BIOLOGICAL: Daratumumab DRUG: Dexamethasone DRUG: Ixazomib                    | interventional |
| <b>NCT04474938</b> | Daratumumab Combined With Bortezomib and Dexamethasone in Mayo 04 Stage III Light Chain Amyloidosis                               | active, not recruiting | Amyloidosis                                                 | DRUG: Daratumumab DRUG: Bortezomib DRUG:Dexamethasone                         | interventional |
| <b>NCT05888870</b> | ITI Using SCT800 Alone or Combining Daratumumab in Hemophilia A Adolescents and Adults With High Titer Inhibitor                  | recruiting             | Hemophilia A With Inhibitor                                 | DRUG: SCT800 and Daratumumab DRUG: SCT800                                     | interventional |
| <b>NCT05250973</b> | A Study of Daratumumab-Based Therapies in Participants With Amyloid Light Chain (AL) Amyloidosis                                  | recruiting             | Amyloidosis                                                 | DRUG: Daratumumab DRUG: Cyclophosphamide DRUG: Bortezomib DRUG: Dexamethasone | interventional |
| <b>NCT05849740</b> | An Exploratory Study of Cluster of Differentiation 38 (CD38) Monoclonal Antibody Combined Corticosteroid in Acquired Hemophilia A | recruiting             | Acquired Hemophilia                                         | DRUG: Daratumumab and corticosteroid treatment                                | interventional |
| <b>NCT04131309</b> | A Study of Daratumumab Monotherapy in Previously Untreated Patients With Stage 3B Light Chain (AL) Amyloidosis                    | active, not recruiting | Light Chain (AL) Amyloidosis, Stage 3B                      | DRUG: Daratumumab DRUG: Bortezomib Injection DRUG: Dexamethasone oral tablet  | interventional |
| <b>NCT05704400</b> | Efficacy of Anti-CD20 Ab Associated With Anti-CD38 in the Childhood Multidrug Dependent and Resistant Nephrotic Syndrome          | not yet recruiting     | Nephrotic Syndrome                                          | DRUG: Rituximab Biosimilar ABP 798 DRUG: Daratumumab                          | interventional |

| NCT Number         | Study Title                                                                                                                                                                                                                      | Study Status           | Conditions                         | Interventions                                                                                                                                  | Study Type     |
|--------------------|----------------------------------------------------------------------------------------------------------------------------------------------------------------------------------------------------------------------------------|------------------------|------------------------------------|------------------------------------------------------------------------------------------------------------------------------------------------|----------------|
| <b>NCT03201965</b> | A Study to Evaluate the Efficacy and Safety of Daratumumab in Combination With Cyclophosphamide, Bortezomib and Dexamethasone (CyBorD) Compared to CyBorD Alone in Newly Diagnosed Systemic Amyloid Light-chain (AL) Amyloidosis | active, not recruiting | Amyloidosis                        | DRUG: Cyclophosphamide DRUG: Bortezomib DRUG: Dexamethasone, 40 mg DRUG: Daratumumab                                                           | interventional |
| <b>NCT05898646</b> | Daratumumab Maintenance Therapy for Improving Survival in Patients With Light Chain Amyloidosis, EMILIA Trial                                                                                                                    | not yet recruiting     | AL Amyloidosis                     | PROCEDURE: Bone Marrow Biopsy BIOLOGICAL: Daratumumab PROCEDURE: Echocardiography OTHER: Questionnaire Administration PROCEDURE: X-Ray Imaging | interventional |
| <b>NCT05065970</b> | Clinical Trial to Assess Efficacy and Safety of the Human Anti-CD38 Antibody Felzartamab (MOR202) in IgA Nephropathy                                                                                                             | active, not recruiting | Immunoglobulin A (IgA) Nephropathy | DRUG: Felzartamab OTHER: Placebo                                                                                                               | interventional |
| <b>NCT05277493</b> | A Registry of Chinese AL Amyloidosis Patients Treated With Subcutaneous or Intravenous Daratumumab                                                                                                                               | recruiting             | AL Amyloidosis                     | -                                                                                                                                              | observational  |

## REFERENCES

- 1 Aggarwal A, White D, Pavord S, et al. Daratumumab for refractory immune-mediated thrombotic thrombocytopenic purpura. *Br J Haematol* 2023. doi:10.1111/bjh.18854 [published Online First: 14 May 2023].
- 2 Canales-Herrerias P, Crickx E, Broketa M, et al. High-affinity autoreactive plasma cells disseminate through multiple organs in patients with immune thrombocytopenic purpura. *J Clin Invest* 2022;132(12).
- 3 Crickx E, Audia S, Robbins A, et al. Daratumumab, an original approach for treating multi-refractory autoimmune cytopenia. *Haematologica* 2021;106(12):3198–201. doi:10.3324/haematol.2021.279232 [published Online First: 1 December 2021].

- 4 Dossier C, Prim B, Moreau C, et al. A global antiB cell strategy combining obinutuzumab and daratumumab in severe pediatric nephrotic syndrome. *Pediatr Nephrol* 2021;36(5):1175–82. doi:10.1007/s00467-020-04811-0 [published Online First: 28 October 2020].
- 5 Dossier C, Leclerc A-L, Fila M, et al. Abstracts of the 54th ESPN Annual Meeting, Ljubljana, Slovenia: DARATUMUMAB ENABLES SUSTAINED REMISSION AFTER IMMUNOADSORPTION IN REFRACTORY MULTIDRUG RESISTANT NEPHROTIC SYNDROME. *Pediatr Nephrol* 2022;37(11):2803–969.
- 6 Gangat N, Bleeker J, Lynch D, et al. Daratumumab for treatment-refractory acquired idiopathic pure red cell aplasia. *Haematologica* 2022;107(10):2523–26. doi:10.3324/haematol.2022.281398 [published Online First: 1 October 2022].
- 7 Holzer M-T, Nies JF, Oqueka T, et al. Successful Rescue Therapy With Daratumumab in Rapidly Progressive Interstitial Lung Disease Caused by MDA5-Positive Dermatomyositis. *Chest* 2023;163(1):e1-e5.
- 8 Jain A, Gupta DK. Daratumumab for refractory warm autoimmune hemolytic anemia. *Ann Hematol* 2021;100(5):1351–53. doi:10.1007/s00277-020-04063-w [published Online First: 14 May 2020].
- 9 Krusche M, Oqueka T, Wichman D, et al. Daratumumab as rescue therapy in life-threatening granulomatosis with polyangiitis. *Rheumatology (Oxford)* 2023. doi:10.1093/rheumatology/kead474 [published Online First: 9 September 2023].
- 10 Landon-Cardinal O, Allard-Chamard H, Chapdelaine H, et al. Daratumumab as a rescue therapy in severe refractory anti-SRP immune-mediated necrotising myopathy. *Ann Rheum Dis* 2023. doi:10.1136/ard-2022-223541 [published Online First: 6 January 2023].
- 11 Liu W, Liu J, Xue F, et al. Anti-CD38 antibody for refractory acquired hemophilia A. *J Thromb Haemost* 2023;21(6):1515–18. doi:10.1016/j.jtha.2023.03.010 [published Online First: 20 March 2023].
- 12 McGlothlin J, Abeykoon J, Al-Hattab E, et al. Bortezomib and daratumumab in refractory autoimmune hemolytic anemia. *Am J Hematol* 2023;98(10):E263-E265. doi:10.1002/ajh.27025 [published Online First: 7 July 2023].
- 13 Mohamed A, Alkhatib M, Alshurafa A, et al. Refractory cold agglutinin disease successfully treated with daratumumab. A case report and review of literature. *Hematology* 2023;28(1):2252651.
- 14 Moonla C, Uaprasert N, Watanaboonyongcharoen P, et al. Daratumumab rapidly reduces high-titre factor VIII inhibitors in haemophilia A patients during life-threatening haemorrhages. *Haemophilia* 2021;27(1):e155-e159. doi:10.1111/hae.14118 [published Online First: 25 August 2020].
- 15 Moonla C, Polprasert C, Krittikarux S, Krajbithong S, Chajuwan T, Sukperm A, Akkawat B, Rojnuckarin P, Uaprasert N. Daratumumab as an Adjunctive Therapy for Acquired Hemophilia A with Poor Prognostic Markers [abstract]. <https://abstracts.isth.org/abstract/daratumumab-as-an-adjunctive-therapy-for-acquired-hemophilia-a-with-poor-prognostic-markers/>. Accessed July 10, 2023.
- 16 C. Moonla, N. Uaprasert, P. Watanaboonyongchroen, R. Jantasing, M. Meesanun, A. Sukperm, S. Faknuam, P. Kaewphichai, S. Sutthinont, P. Cheankiln, B. Akkawat, U. Bunworasate, P. Rojnuckarin. Daratumumab in Combination with Rituximab and Immune Tolerance Induction Can Rapidly Eradicate High-titer Factor VIII Inhibitor in a Patient with Hemophilia A. <https://academy.isth.org/isth/2019/melbourne/263428/chatphatai.moonla.daratumumab.in.combination.with.rituximab.and.immune.html> on 10 July 2023.

- 17 Moonla C, Polprasert C, Krittikarux S, et al. Adjunctive daratumumab can induce rapid remission in acquired haemophilia A with poor prognostic markers. *Haemophilia* 2023. doi:10.1111/hae.14850 [published Online First: 4 September 2023].
- 18 Yalcin Mutlu M, Wacker J, Tascilar K, et al. Effective and safe treatment of anti-CD38 therapy in systemic lupus erythematosus-associated refractory cerebral vasculitis induces immune tolerance. *Rheumatology (Oxford)* 2023;62(2):e21-e23.
- 19 Nocturne G, Marmontel O, Di Filippo M, et al. Efficacy of daratumumab in refractory primary Sjögren disease. *RMD Open* 2023;9(3).
- 20 Ochoa S, Ding L, Kreuzburg S, et al. Daratumumab (Anti-CD38) for Treatment of Disseminated Nontuberculous Mycobacteria in a Patient With Anti-Interferon- $\gamma$  Autoantibodies. *Clin Infect Dis* 2021;72(12):2206–08.
- 21 Ostendorf L, Burns M, Durek P, et al. Targeting CD38 with Daratumumab in Refractory Systemic Lupus Erythematosus. *N Engl J Med* 2020;383(12):1149–55.
- 22 Alexander T, Ostendorf L, Biesen R, et al. Sustained responses after anti-CD38 treatment with daratumumab in two patients with refractory systemic lupus erythematosus. *Ann Rheum Dis* 2023. doi:10.1136/ard-2023-224152 [published Online First: 3 July 2023].
- 23 Ostendorf L, Burns M, Wagner DL, et al. Daratumumab for the treatment of refractory ANCA-associated vasculitis. *RMD Open* 2023;9(1).
- 24 Ostendorf L, Muench F, Thormählen L, et al. Rescue combination treatment of anti-MDA5-associated ARDS with daratumumab. *RMD Open* 2023;9(3).
- 25 Pereda MA, Hosahalli Vasanna S, Desai NJ, et al. Case report: Daratumumab treatment in pre-transplant alloimmunization and severe hemolytic anemia. *Front Immunol* 2022;13:1055473. doi:10.3389/fimmu.2022.1055473 [published Online First: 29 November 2022].
- 26 Pleguezuelo DE, Díaz-Simón R, Cabrera-Marante O, et al. Case Report: Resetting the Humoral Immune Response by Targeting Plasma Cells With Daratumumab in Anti-Phospholipid Syndrome. *Front Immunol* 2021;12:667515. doi:10.3389/fimmu.2021.667515 [published Online First: 12 April 2021].
- 27 Ratuszny D, Skripuletz T, Wegner F, et al. Case Report: Daratumumab in a Patient With Severe Refractory Anti-NMDA Receptor Encephalitis. *Front Neurol* 2020;11:602102. doi:10.3389/fneur.2020.602102 [published Online First: 22 December 2020].
- 28 Rieger MJ, Stolz SM, Ludwig S, et al. Daratumumab in rituximab-refractory autoimmune haemolytic anaemia. *Br J Haematol* 2021;194(5):931–34. doi:10.1111/bjh.17655 [published Online First: 28 June 2021].
- 29 Rixecker TM, Lepper PM, Mang S, et al. Daratumumab for a Patient With Refractory Antineutrophil Cytoplasmic Antibody-Associated Vasculitis. *JAMA Intern Med* 2023;183(6):615–18.
- 30 Roccatello D, Fenoglio R, Caniggia I, et al. Daratumumab monotherapy for refractory lupus nephritis. *Nat Med* 2023;29(8):2041–47. doi:10.1038/s41591-023-02479-1 [published Online First: 10 August 2023].
- 31 Rottländer Yella, Baumann Michael, Gramatzki Martin, Schmiedeberg Kristin, von Kempis Johannes, Rubbert-Roth Andrea. Successful treatment of refractory SLE-associated autoimmune hemolytic anemia with a low dose regimen using the CD38 directed monoclonal antibody daratumumab. *Swiss Medical Weekly* 2022;152 (Suppl. 261).
- 32 Scheibe F, Ostendorf L, Prüss H, et al. Daratumumab for treatment-refractory antibody-mediated diseases in neurology. *Eur J Neurol* 2022;29(6):1847–54. doi:10.1111/ene.15266 [published Online First: 10 February 2022].

- 33 Scheibe F, Ostendorf L, Reincke SM, et al. Daratumumab treatment for therapy-refractory anti-CASPR2 encephalitis. *J Neurol* 2020;267(2):317–23. doi:10.1007/s00415-019-09585-6 [published Online First: 19 October 2019].
- 34 Strüßmann T, Jung J, Heinz J, et al. Long-term complete remission of refractory severe idiopathic immune thrombocytopenia (ITP) treated with daratumumab. *Ann Hematol* 2023;102(1):245–47. doi:10.1007/s00277-022-05035-y [published Online First: 17 November 2022].
- 35 van den Berg J, Kremer Hovinga JA, Pflieger C, et al. Daratumumab for immune thrombotic thrombocytopenic purpura. *Blood Adv* 2022;6(3):993–97.
- 36 Vernava I, Schmitt CA. Daratumumab as a novel treatment option in refractory ITP. *Blood Cells Mol Dis* 2023;99:102724. doi:10.1016/j.bcmd.2023.102724 [published Online First: 13 January 2023].
- 37 Vink CH, van Cranenbroek B, van der Heijden JW, et al. Daratumumab for multidrug-resistant phospholipase-A2 receptor-related membranous nephropathy. *Kidney Int* 2022;101(3):646–47.
- 38 Xie X-T, Xiao Y-Y, Zhang Y, et al. Combination regimens containing daratumumab for initial diagnosed acquired thrombotic thrombocytopenic purpura. *J Thromb Thrombolysis* 2023;55(2):399–405. doi:10.1007/s11239-023-02768-z [published Online First: 13 January 2023].
