# Supplementary material for: Daratumumab for autoimmune diseases: a systematic review
Source: PubMed Central journal article supplement — RMD Open. 2023 Dec 14;9(4):e003604. doi: 10.1136/rmdopen-2023-003604 (PMC10729190; doi:10.1136/rmdopen-2023-003604), 2023-12-14
Supplement: rmdopen-2023-003604supp002.pdf [file rmdopen-2023-003604supp002.pdf]

## Daratumumab for autoimmune disease – a systematic review

### Medline (via PubMed):

(daratumumab[Title/Abstract]) NOT (((leukemia[Title]) OR (lymphoma[Title])) OR (myeloma[Title])) OR (amyloidosis[Title]))

### Embase (via Ovid):

daratumumab.ti not leukemia.ti  
and  
daratumumab.ti not lymphoma.ti  
and  
daratumumab.ti not myeloma.ti  
and  
daratumumab.ab not amyloidosis.ti  
and  
daratumumab.ab not leukemia.ti  
and  
daratumumab.ab not lymphoma.ti  
and  
daratumumab.ab not myeloma.ti  
and  
daratumumab.ab not amyloidosis.ti
