# Supplementary figures and images for: Daratumumab for autoimmune diseases: a systematic review
Source: PubMed Central journal article supplement — RMD Open. 2023 Dec 14;9(4):e003604. doi: 10.1136/rmdopen-2023-003604 (PMC10729190; doi:10.1136/rmdopen-2023-003604), 2023-12-14

## Concomitant therapy

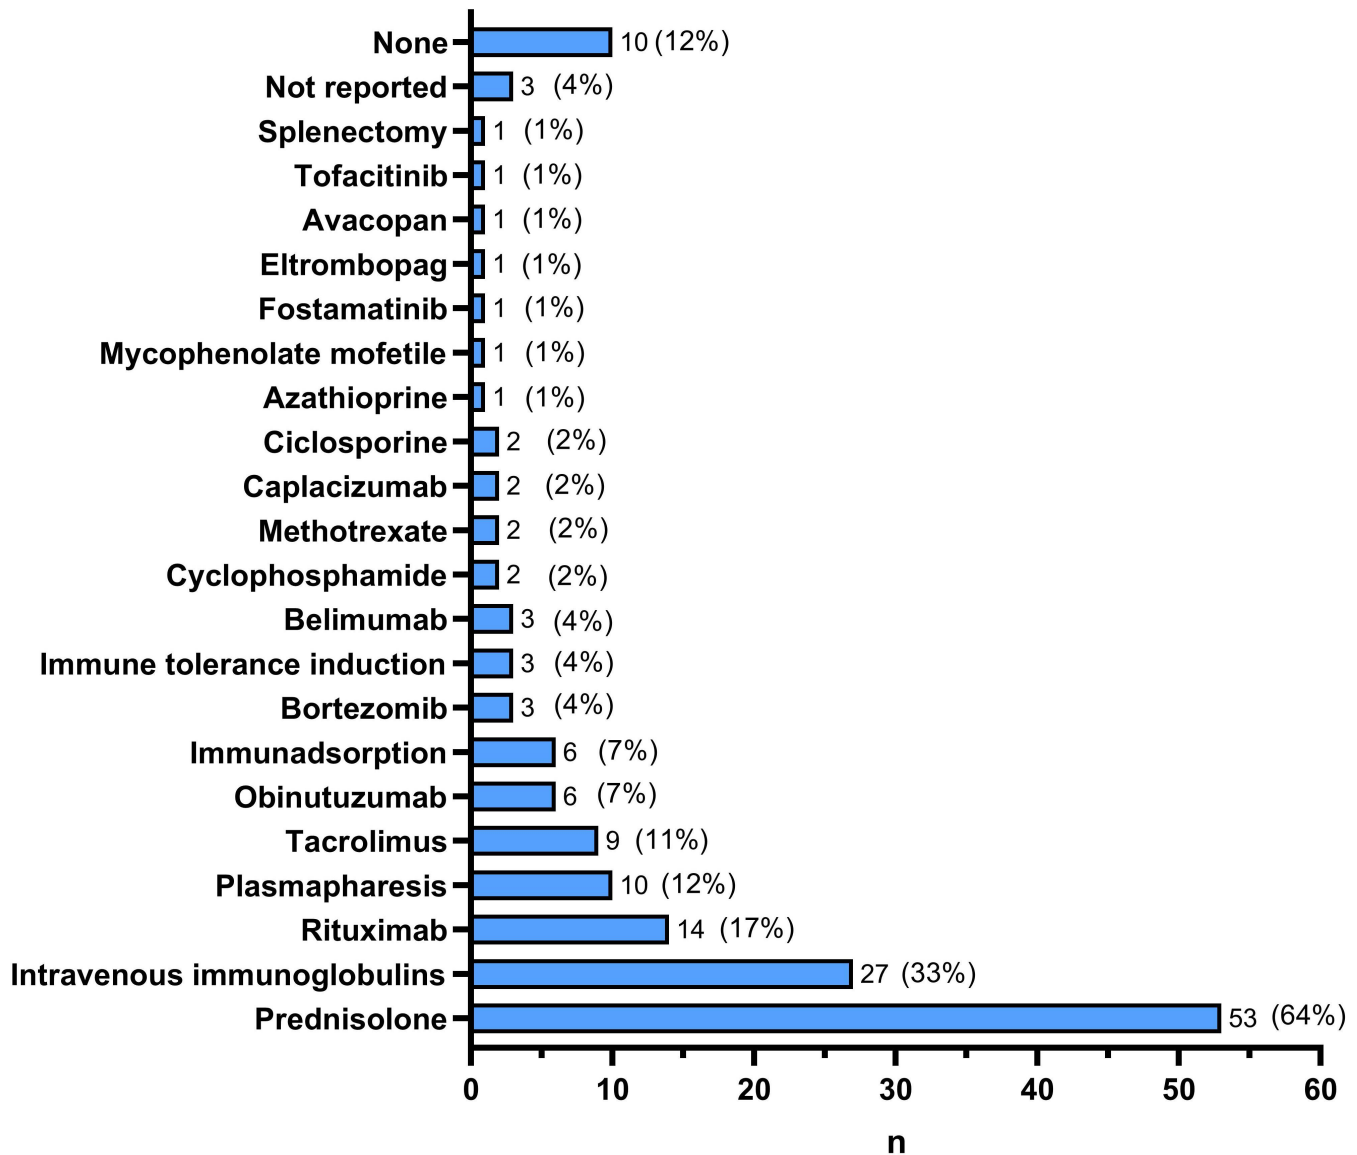

Supplement: rmdopen-2023-003604supp003.pdf [file rmdopen-2023-003604supp003.pdf]

## Number of applications

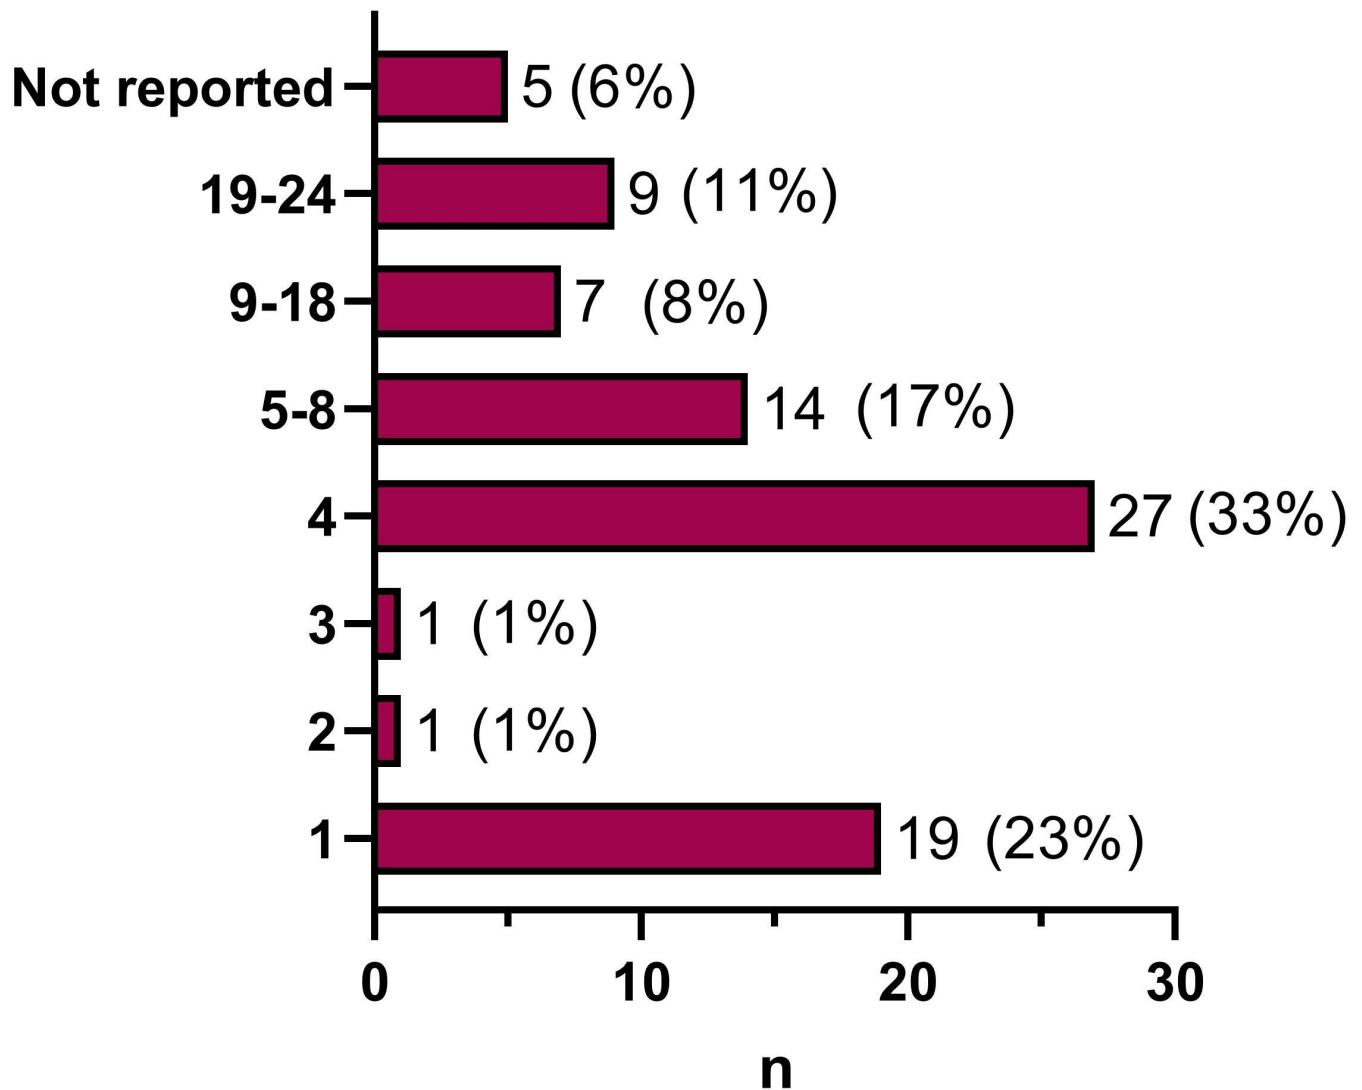

Supplement: rmdopen-2023-003604supp004.pdf [file rmdopen-2023-003604supp004.pdf]

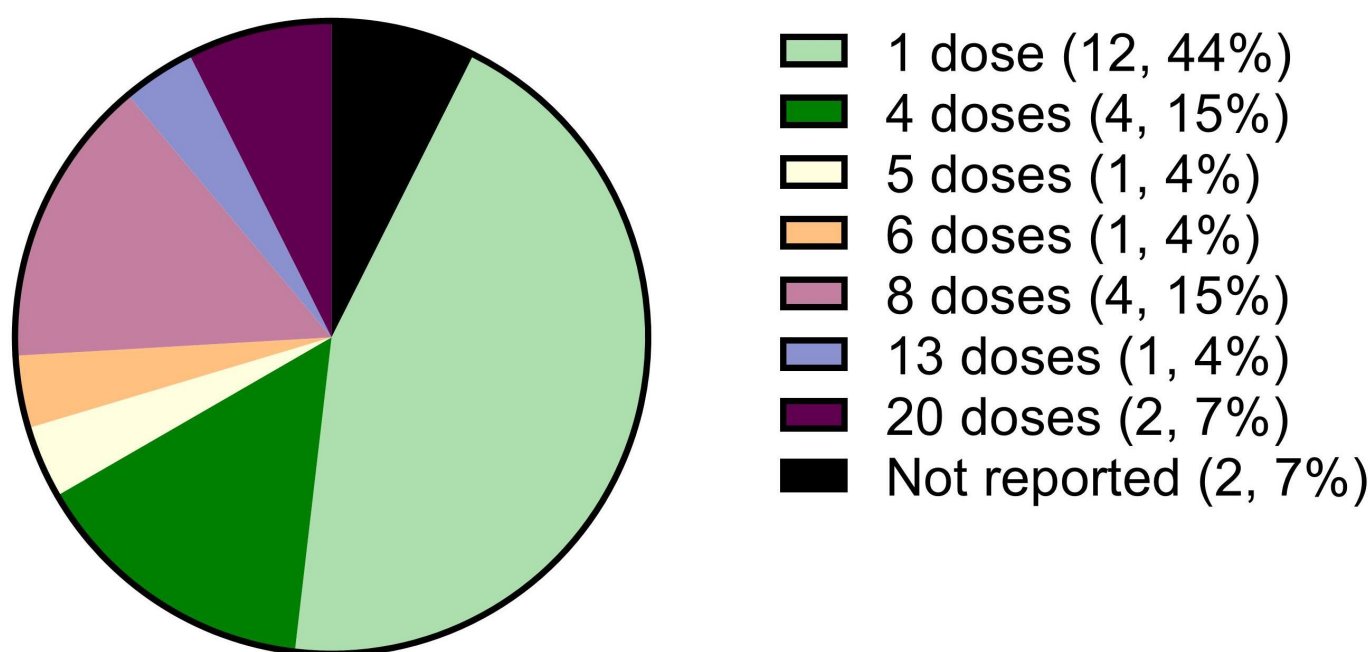

**Total=27**

Supplement: rmdopen-2023-003604supp005.pdf [file rmdopen-2023-003604supp005.pdf]
